# Supplementary material for: Autoantibody signature in hepatocellular carcinoma using seromics
Source: Springer Nature journal article supplement (doi:10.1186/s13045-020-00918-x), 2020-07-02

# Supplementary Fig. S1

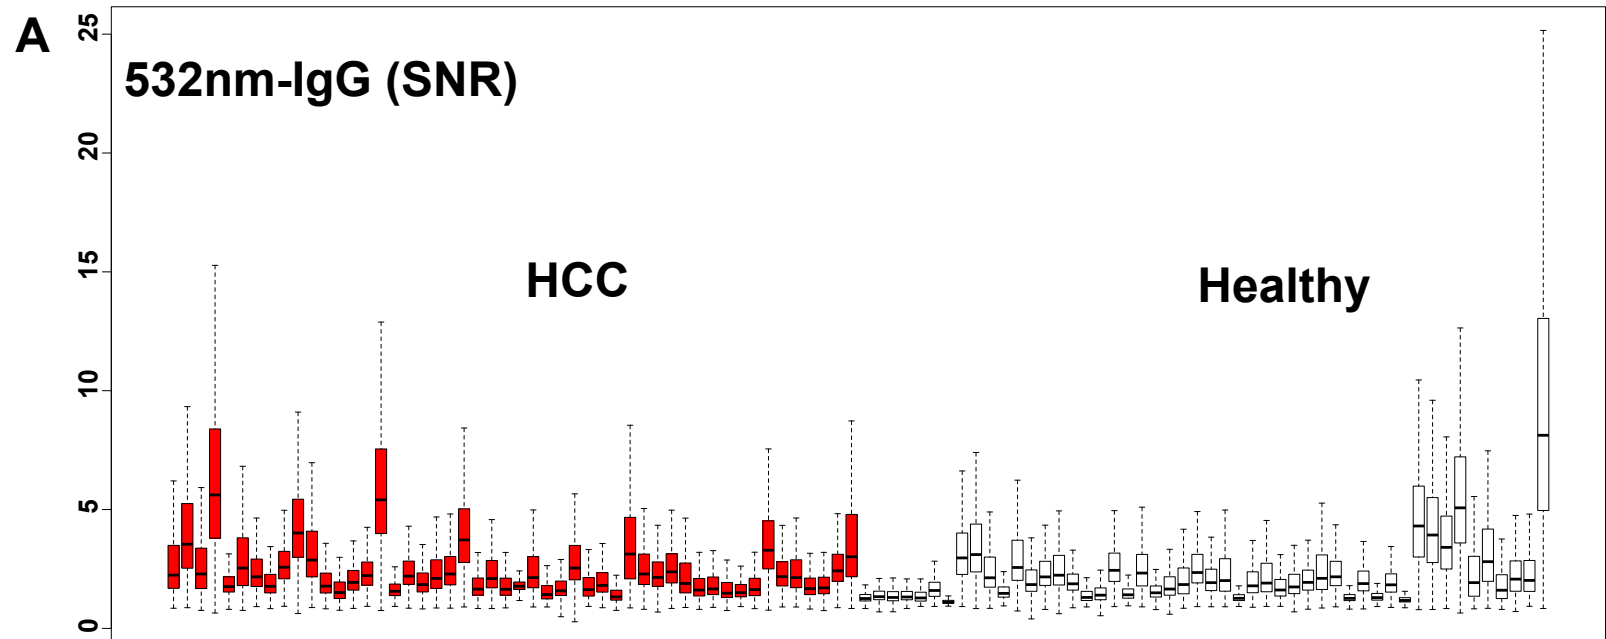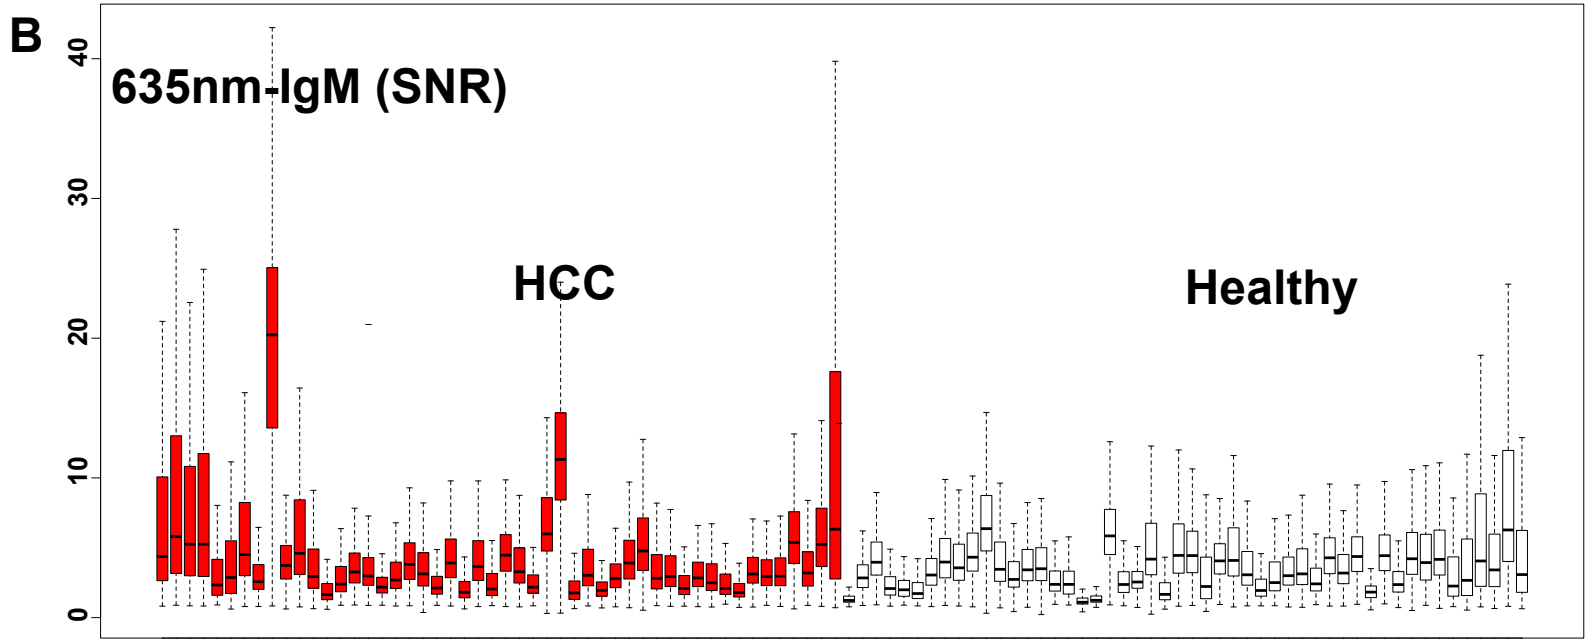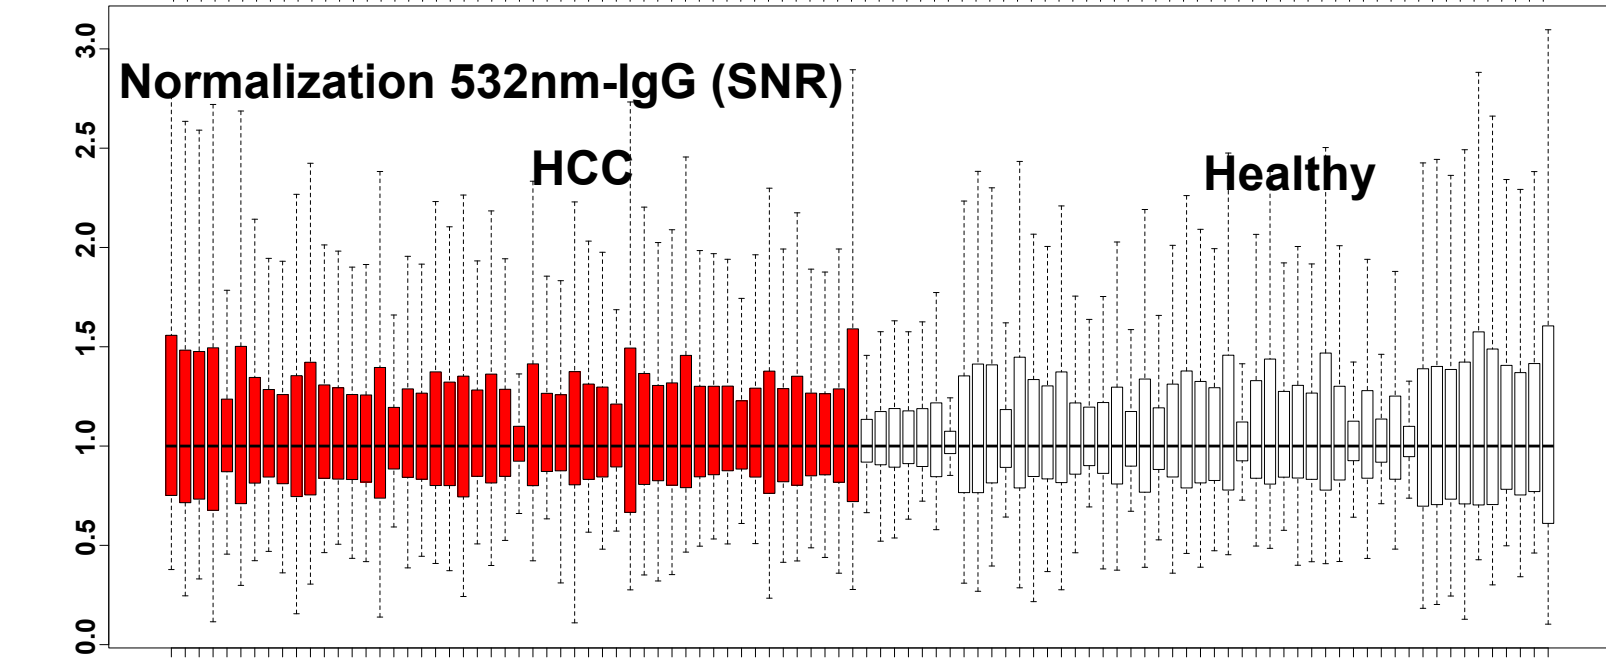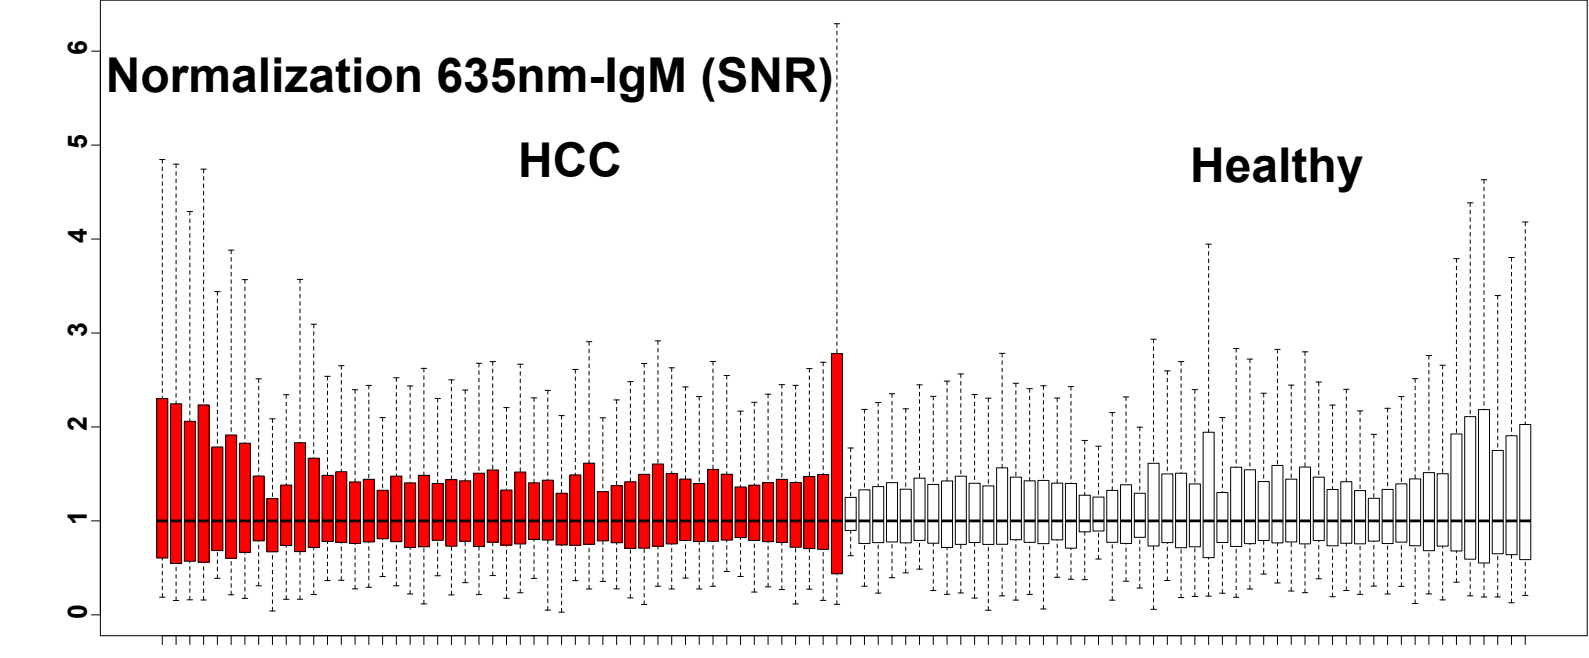

Supplement: MOESM1 [file 18142588]
