# Supplementary material for: Autoantibody signature in hepatocellular carcinoma using seromics
Source: Springer Nature journal article supplement (doi:10.1186/s13045-020-00918-x), 2020-07-02
Supplement: MOESM4 [file 18142588]

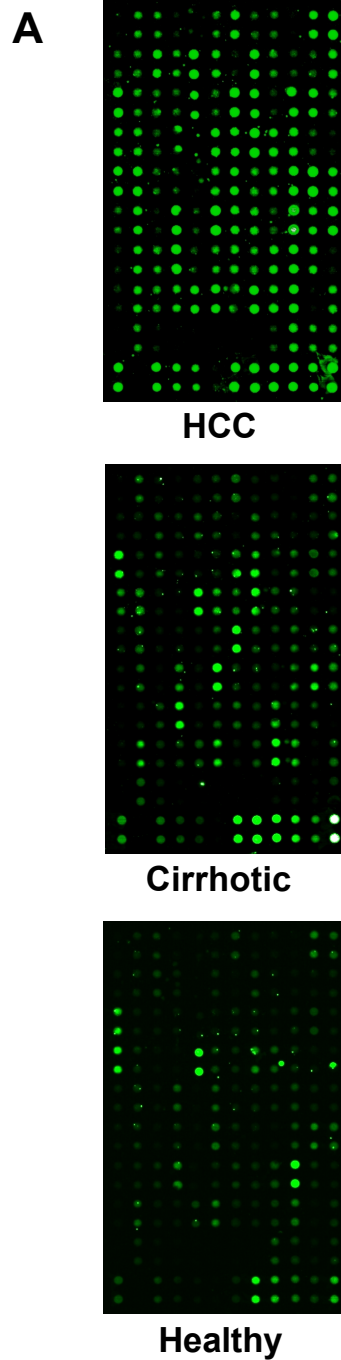

**B**

| Protein | HCC | Cirrhotic | <i>p</i> -value | FC  | Sensitivity | Specificity |
|---------|-----|-----------|-----------------|-----|-------------|-------------|
| EGFR    |     |           | 0.00            | 2.1 | 26.2%       | 94.6%       |
| MAS1    |     |           | 0.00            | 1.3 | 31.0%       | 90.2%       |
| SLC44A3 |     |           | 0.00            | 1.6 | 24.4%       | 95.7%       |
| ZNF428  |     |           | 0.00            | 1.7 | 18.5%       | 94.6%       |
| UBL7    |     |           | 0.00            | 1.9 | 17.3%       | 90.2%       |

**C**

| Protein | HCC | Healthy | <i>p</i> -value | FC  | Sensitivity | Specificity |
|---------|-----|---------|-----------------|-----|-------------|-------------|
| EGFR    |     |         | 0.00            | 1.8 | 25.1%       | 90.4%       |
| MAS1    |     |         | 0.00            | 1.4 | 33.2%       | 90.4%       |
| SLC44A3 |     |         | 0.00            | 1.4 | 21.8%       | 92.6%       |
| ZNF428  |     |         | 0.00            | 2.3 | 23.2%       | 94.8%       |
| ASAH1   |     |         | 0.00            | 1.2 | 19.9%       | 97.8%       |
| CIAPIN1 |     |         | 0.00            | 1.7 | 21.4%       | 96.3%       |
